# Supplementary material for: The quantum size and spin–orbit coupling effects in BiVO4 with several atomic layers studied by density functional theory
Source: Royal Society of Chemistry journal article supplement (doi:10.1039/d2cp00873d), 2022-01-01
Supplement: d2cp00873d1.pdf [file d2cp00873d1.pdf]

## The quantum size and spin-orbit coupling effect in $\text{BiVO}_4$ with several atomic layers studied by density functional theory

Taifeng Liu\* and Yongqiang Zheng

National & Local Joint Engineering Research Center for Applied Technology of Hybrid Nanomaterials, Henan University, Kaifeng 475004, China

Corresponding author: Taifeng Liu: [tliu@vip.henu.edu.cn](mailto:tliu@vip.henu.edu.cn)

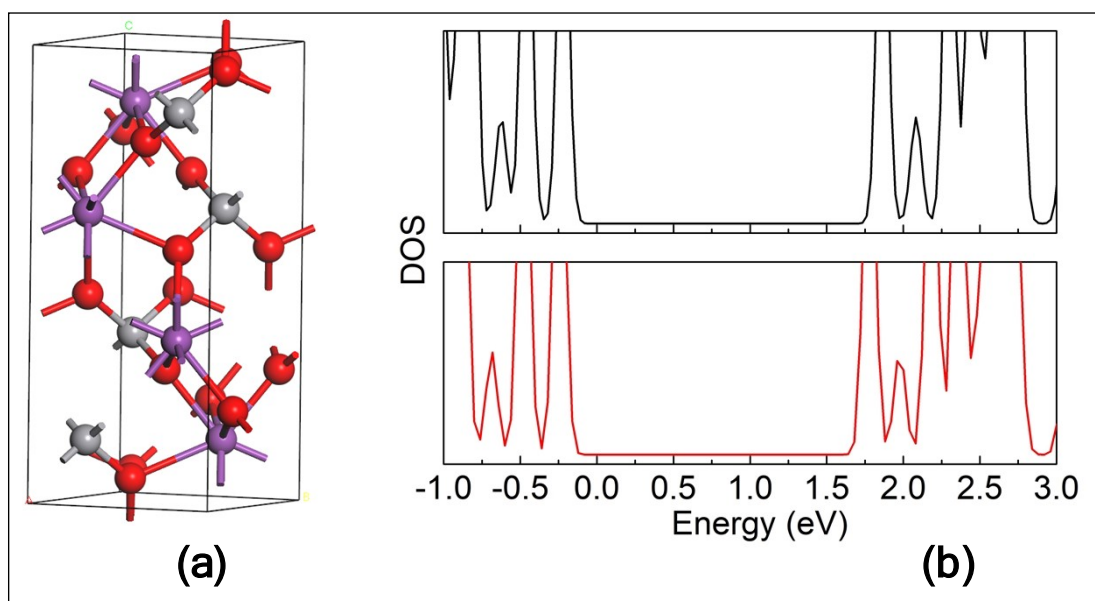

Figure S1. (a) The geometry structure and (b) density of state (DOS) of the bulk BVO. In the DOS, the black line is the result without spin-orbit coupling (SOC), and the red line is the result with SOC. The red, purple, and grey spheres are O, Bi, and V atoms.

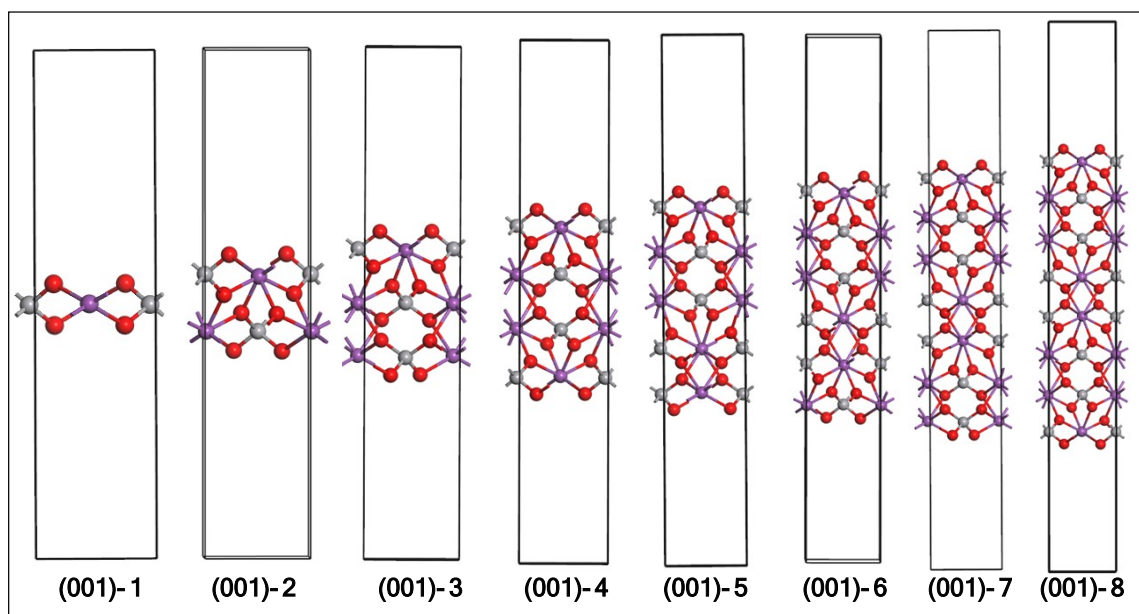

Figure S2. The geometry of (001) slabs. The red, purple, and grey spheres are O, Bi, and V atoms.

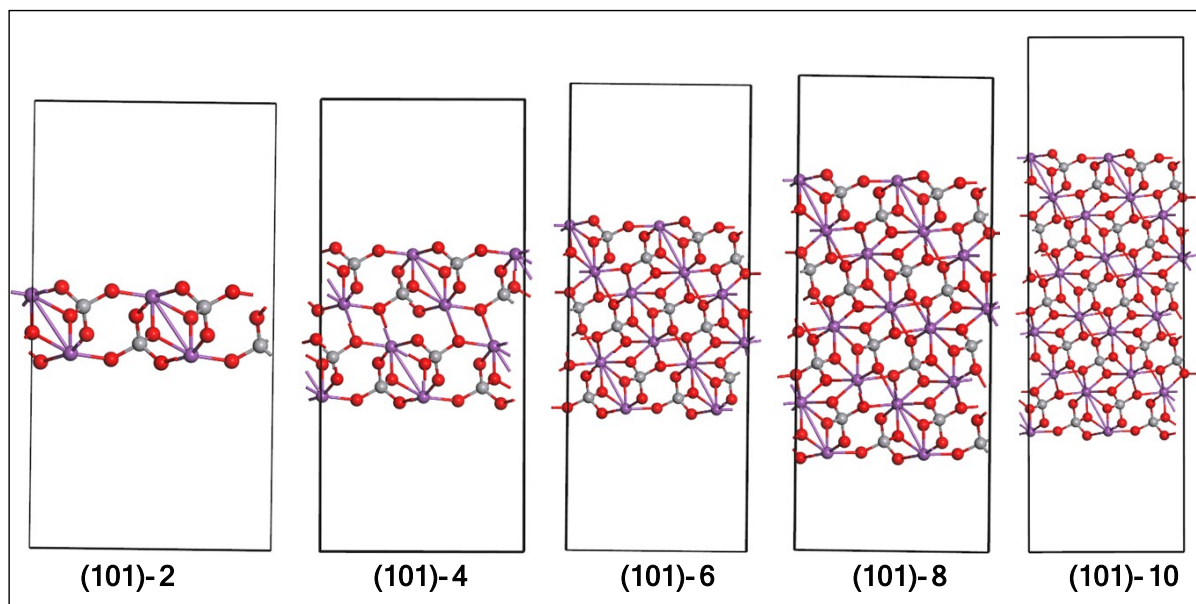

Figure S3. The geometry of (101) slabs. The red, purple, and grey spheres are O, Bi, and V atoms.

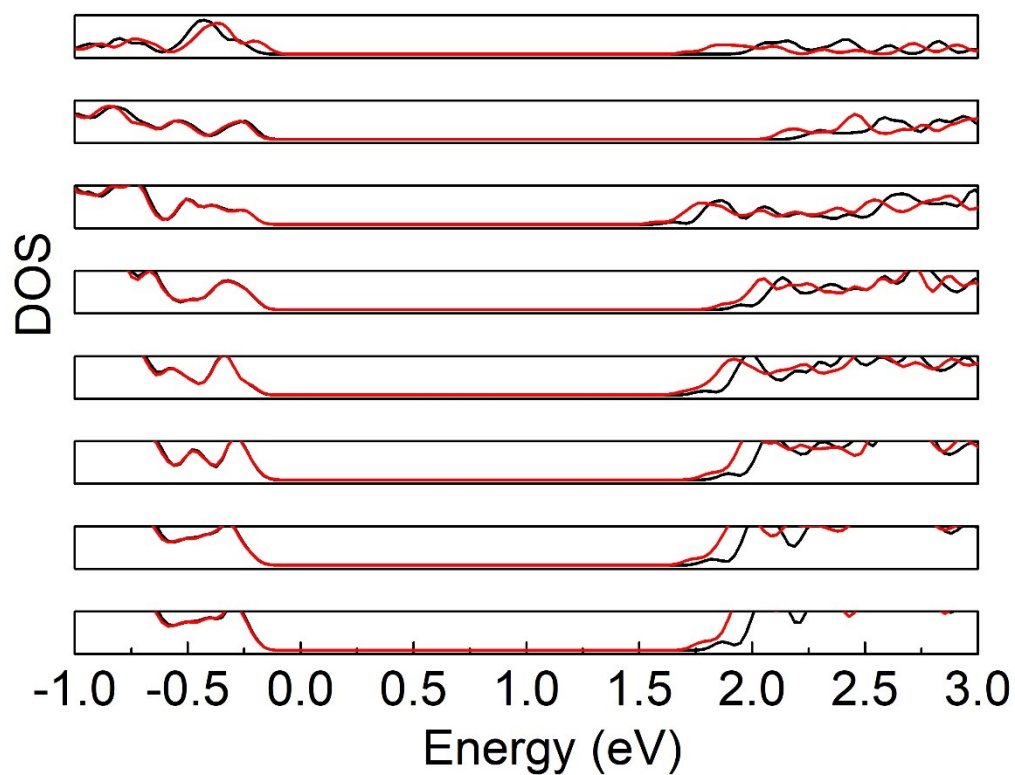

Figure S4. The DOS of all the (001)-slabs. From top to the bottom is the DOS of 1 to 8 Bi layers slab. The black line is the result without spin-orbit coupling (SOC), and the red line is the result with SOC.

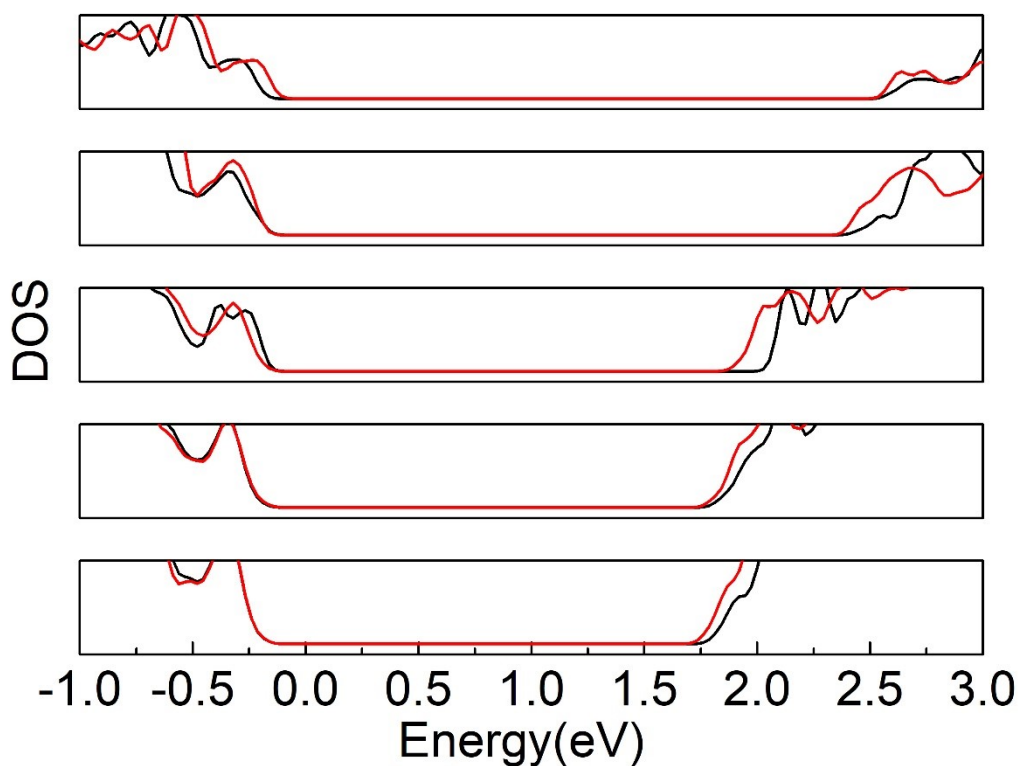

Figure S5. The DOS of all the (101)-slabs. From the top to the bottom is the DOS of 2, 4, 6, 8 and 10 Bi layers slab. The black line is the result without spin-orbit coupling (SOC), and the red line is the result with SOC.

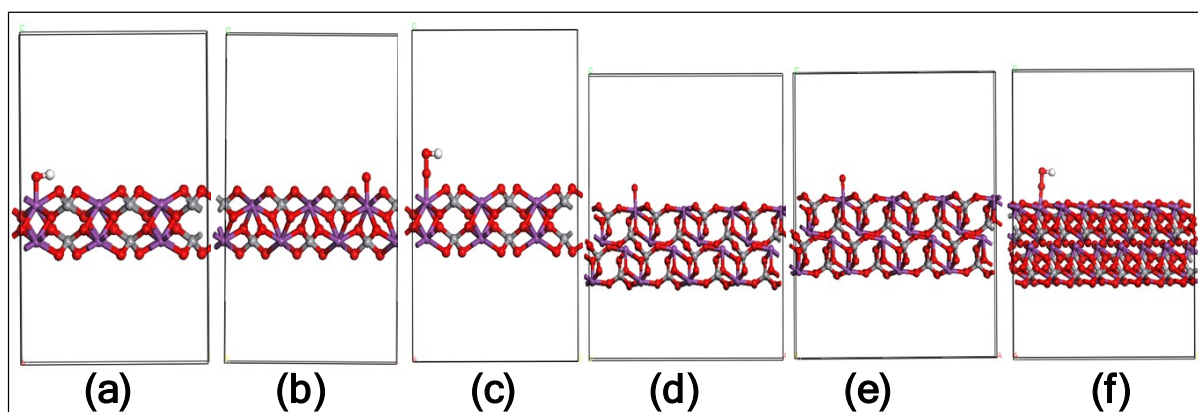

Figure S6. The structure of OER intermediates (a, d)  $\text{OH}^*$ , (b, e)  $\text{O}^*$ , and (c, f)  $\text{OOH}^*$  on (001) and (101) slabs respectively. The red, purple, grey, and white spheres are O, Bi, V, and H atoms.

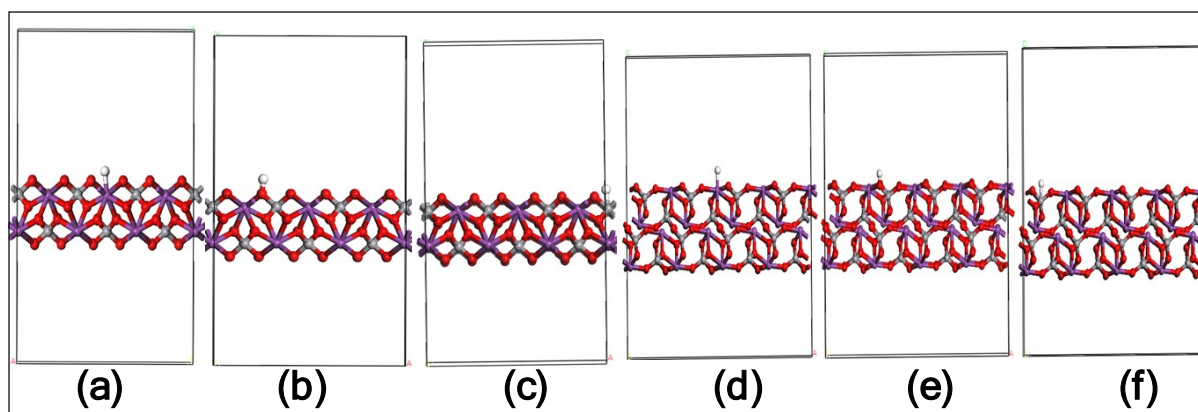

Figure S7. The structure of HER intermediates (a, d) H\* on Bi site, (b, e) H\* on O site, and (c, f) H\* on V site on (001) and (101) slabs respectively. The red, purple, grey, and white spheres are O, Bi, V, and H atoms.
